# Supplementary material for: Effective charge separation of inverted polymer solar cells using versatile MoS2 nanosheets as an electron transport layer
Source: Royal Society of Chemistry journal article supplement (doi:10.1039/c9ta03989a), 2019-01-01
Supplement: c9ta03989a1.pdf [file c9ta03989a1.pdf]

## Supporting Information

### Effective Charge Separation of Inverted Polymer Solar Cells using Versatile MoS<sub>2</sub> Nanosheets as Electron Transport Layer

Kyu Seung Lee<sup>a,||</sup>, Young Jae Park<sup>a,||</sup>, Jaeho Shim<sup>a,b</sup>, Chil-Hyoung Lee<sup>a</sup>, Guh-Hwan Lim<sup>a</sup>, Hak Yong Kim<sup>c,d</sup>, Jin Woo Choi<sup>e</sup>, Chang-Lyoul Lee<sup>e</sup>, Yeonghoon Jin<sup>b</sup>, Kyoungsik Yu<sup>b</sup>, Hee-Suk Chung<sup>f</sup>, Basavaraj Angadi<sup>g</sup>, Seok-In Na<sup>h</sup>, and Dong Ick Son<sup>a,i\*</sup>

<sup>a</sup>Institute of Advanced Composite Materials, Korea Institute of Science and Technology, 92 Chudong-ro, Bongdong-eup, Wanju-gun, Jeonbuk, 55324, Republic of Korea

<sup>b</sup>School of Electrical Engineering, Korea Advanced Institute of Science and Technology, 291 Daehak-ro, Yuseong-gu, Daejeon 34141, Republic of Korea

<sup>c</sup>Department of BIN Convergence technology, Chonbuk National University, 567 baekje-daero, Deokjin-gu, Jeonju, Jeonbuk, 54896, Republic of Korea

<sup>d</sup>Department of Organic Materials & Fiber Engineering, Chonbuk National University, 567 Baekje-daero, Deokjin-gu, Jeonju, Jeonbuk, 54896, Republic of Korea

<sup>e</sup>Advanced Photonics Research Institute, Gwangju Institute of Science and Technology, 1 Oryong-dong Buk-gu, Gwangju 500-712, Republic of Korea

<sup>f</sup>Analytical Research Division, Korea Basic Science Institute, 20 Geonji-ro, Deokjin-gu, Jeonju, Jeonbuk, 54907, Republic of Korea

<sup>g</sup>Department of Physics, Bangalore University, Bangalore, 560-056, India

<sup>h</sup>Professional Graduate School of Flexible and Printable Electronics and Polymer Materials Fusion Research Center, Chonbuk National University, Jeonju-si, Jeonbuk, 664-14, Republic of Korea

---

\*Corresponding author: *E-mail address:* [eastwing33@kist.re.kr](mailto:eastwing33@kist.re.kr) (D. I. Son) Tel: +82 63 2198155, Fax: +82 63 2198129

|| These authors contributed equally to this work.

† Electronic supplementary information (ESI) available: additional topographic images, and additional ADF and ABF images, and additional UPS data of PEIE/ITO/glass, and additional energy band diagram.

<sup>i</sup>KIST school, Department of Nanomaterials and Nano Science, University of Science and Technology (UST), Daejeon 34113, Republic of Korea

## **Contents**

- 1. Experimental.**
- 2. The topographic images of MoS<sub>2</sub> NSs and line profile.**
- 3. The topographic images of SiO<sub>2</sub> on Si substrate and PEIE on SiO<sub>2</sub> on Si substrate.**
- 4. The annular dark field (ADF) and annular bright field (ABF) images of the MoS<sub>2</sub> Nanosheets on the PEIE/ITO/glass.**
- 5. The work function ( $\Phi$ ) of the spin-coated PEIE onto ITO/glass and ITO/glass calculated by using a ultraviolet photoelectron spectroscopy (UPS).**
- 6. Energy level diagram of the iPSCs with the MoS<sub>2</sub> interlayer highlighting pathways for charge generation and transport.**
- 7. The structure of optical absorption simulation.**

## 1. Experimental

**1. 1. Exfoliation of MoS<sub>2</sub> Nanosheets:** 2 g of the commercial MoS<sub>2</sub> sheets (2D semiconductor) was dispersed in 1 L of ethanol. The MoS<sub>2</sub> dispersion was treated by tip-sonication for 5 hours. Then, the MoS<sub>2</sub> dispersion was centrifuged for 30 min at 8000 rpm to collect a supernatant and remove precipitation. The initial concentration of the MoS<sub>2</sub> NS supernatant was  $100 \pm 2.7$  mg/L. Then, the supernatant was diluted in 1mL of ethanol and the concentration was estimated to be about 16.67 mg/L.

**1. 2. Characterization of MoS<sub>2</sub> Nanosheets:** The MoS<sub>2</sub> NSs were characterized through TEM, AFM, Raman spectroscopy, UV-vis absorption spectroscopy, and PL spectroscopy. The TEM images were obtained using a Philips Tecnai G2 F20 TEM microscope with an accelerating voltage of 200 kV. The AFM surface images and height distribution were measured by Park system NX10. The MoS<sub>2</sub> NSs solution in DMF was deposited on a silicon wafer by spin coating and drying under ambient conditions. The AFM image was obtained in a tapping mode. Different concentrations of MoS<sub>2</sub> NSs solution were used to achieve layers deposited on SiO<sub>2</sub>/Si substrate. Raman spectra of MoS<sub>2</sub> NSs were obtained using a Horiba Jobin Yvon-Labram HR UV visible NIR Raman microscope spectrometer with a 514 nm Ar laser. Ultraviolet-visible (UV-vis) absorption spectra of the MoS<sub>2</sub> NSs measured with a Shimadzu, UV-2600 UV-vis spectrophotometer. PL spectra were obtained using a Horiba NanoLog-C. To demonstrated the MoS<sub>2</sub> NSs of energy levels using electrochemical cyclic voltammetry. MoS<sub>2</sub> NSs were dispersed in a 0.5% Nafion solution (isopropanol and dimethylformamide) and dropped on glassy carbon electrode to serve as the working electrode. The counter electrode and the reference electrode were platinum wire and Ag/AgNO<sub>3</sub> (in 0.01 M MeCN), respectively, and the electrolyte was a

solution of 0.1 M tetrabutylammonium phosphorus hexa fluoride (TBAPF6) in anhydrous acetonitrile. Measurements were performed at room temperature with a scan rate of 100 mV/s.

**1. 3. Device fabrication process of iPSCs:**  $1.5 \times 1.5 \text{ cm}^2$  patterned ITO-coated glass substrates were cleaned with acetone, ethanol, and 2-propanol, respectively. The ITO-coated glass was treated with  $\text{O}_2$  plasma for 40 sec. PEIE layer was spin-coated on the ITO-coated glass at 4000 rpm for 40 sec, and the substrate was annealed at  $110 \text{ }^\circ\text{C}$  for 10 min. After annealing, 0.1 ml of  $\text{MoS}_2$  NSs in 1 ml of ethanol solution was spin-coated on the PEIE surface at 4000 rpm for 40 sec, followed by annealing at  $140 \text{ }^\circ\text{C}$  for 10 min under ambient conditions. The substrates were transferred into a nitrogen-filled glove box. The blend of P3HT:PC<sub>60</sub>BM (1.5:1 (by weight)), PTB7:PC<sub>71</sub>BM (1:1.5 (by weight)), PTB7-Th:PC<sub>71</sub>BM (1:1.5 (by weight)) solution were spin-coated onto the  $\text{MoS}_2$  NSs interlayer at 2000 rpm for 10 sec and 1400 rpm for 10 sec, respectively. Finally,  $\text{MoO}_3$  (10 nm) and Ag (80 nm) were deposited by thermal evaporation on the active layer under a pressure of  $1 \times 10^{-6}$  Torr.

**1. 4. Characterization of iPSCs structures:** The structures of iPSCs with the  $\text{MoS}_2$  NSs/PEIE/ITO/glass were characterized through Focused Ion Beam (FIB), TEM and STEM-EDS. In detail, The FIB was applied for cross-sectional sample preparation of iPSCs with both TEM and STEM-EDS. Thinly sliced TEM samples were prepared using a FIB (Nova nanolab 600 Dual Beam) operating at 5~20 kV with Ga ions. The TEM images were obtained using a Philips Tecnai G2 F20 TEM microscope with an accelerating voltage of 200 kV. The STEM-EDS images were obtained using a JEM-ARM200F Cs-corrected STEM.

**1. 5. Photovoltaic device characterization of iPSCs with/without  $\text{MoS}_2$  Nanosheets:** The iPSCs were then tested in air under an AM 1.5 G illumination of  $100 \text{ mW/cm}^2$  (Oriel 1 kW solar

simulator), which was calibrated with the International System of Units (SI) (SRC-1000-TC-KG5-N, VLSI Standards, Inc) for accurate measurement. The external quantum efficiency (EQE) was measured using an Oriel IQE-200 (Newport), a calibrated Si UV detector and an SR8570 low noise current amplifier. In TCSPC, photo-excitation was carried out by the mode-locked titanium: sapphire laser with the wavelength of 400 nm and luminescence signals were detected by an InGaAs based photomultiplier detector.

## 2. The topographic images of MoS<sub>2</sub> NSs and line profile.

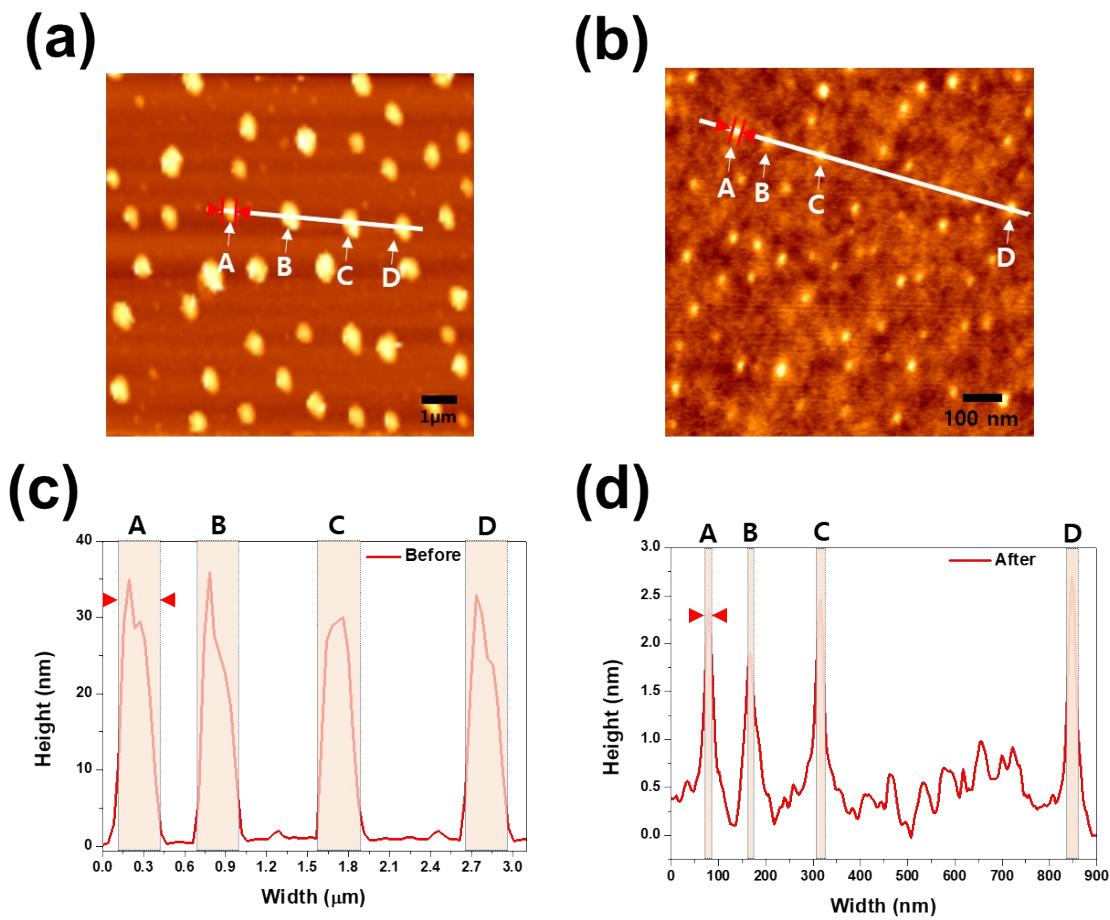

**Figure S1.** Topographic images and line profiles of the MoS<sub>2</sub> NSs before (a) and (c) after tip-sonication exfoliation and centrifugation process (b) and (d) corresponding to the white line in the topographic images.

3. The topographic images of SiO<sub>2</sub> on Si substrate and PEIE on SiO<sub>2</sub> on Si substrate.

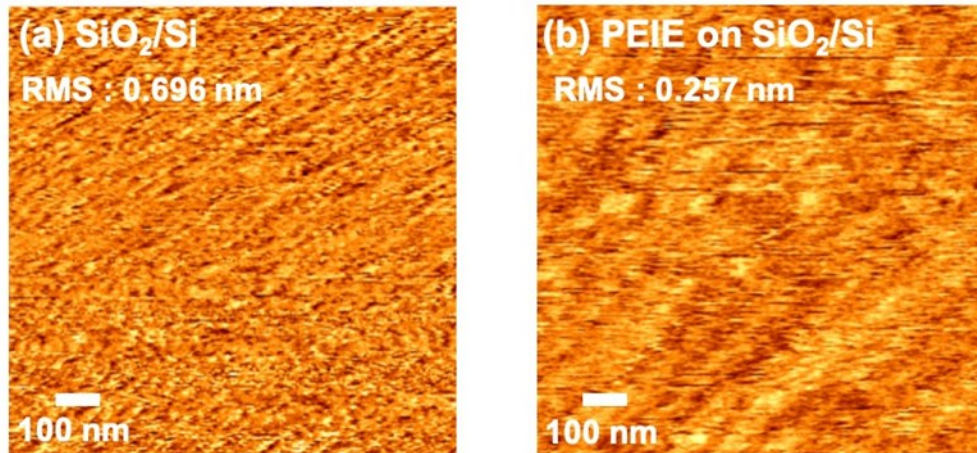

**Figure S2.** Topographic images RMS values of the SiO<sub>2</sub> on Si (a) and PEIE on SiO<sub>2</sub> on Si substrate (b).



4. The annular dark field (ADF) and annular bright field (ABF) images of the MoS<sub>2</sub> NSs on the PEIE/ITO/glass.

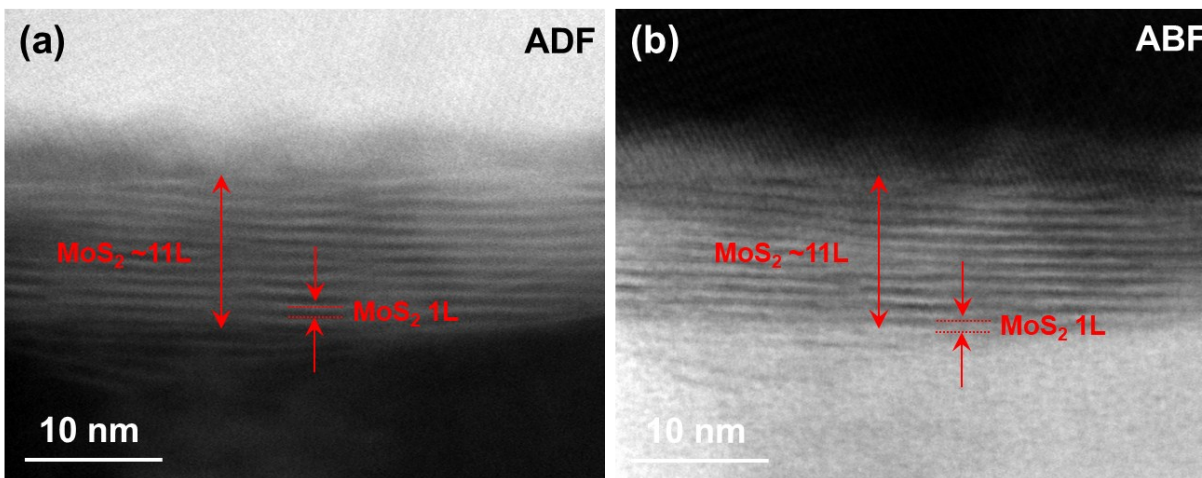

**Figure S3.** The annular dark field (ADF) and annular bright field (ABF) images of the MoS<sub>2</sub> NSs.

We performed image analysis of MoS<sub>2</sub> NSs by a spherical aberration-corrected scanning TEM (Cs-TEM). As shown in Fig. S2(a) and S2(b), we show the annular dark field (ADF) and annular bright field (ABF) images of the MoS<sub>2</sub> NSs and the ITO/glass substrate. Through the ADF and ABF images, the contrast of the MoS<sub>2</sub> NSs layer was improved by confirming the shape of the MoS<sub>2</sub> NSs. As a result, MoS<sub>2</sub> NSs applied as ETL could be clearly confirmed.

5. The work function ( $\Phi$ ) of the spin-coated PEIE onto ITO/glass and ITO/glass calculated by using an ultraviolet photoelectron spectroscopy (UPS).

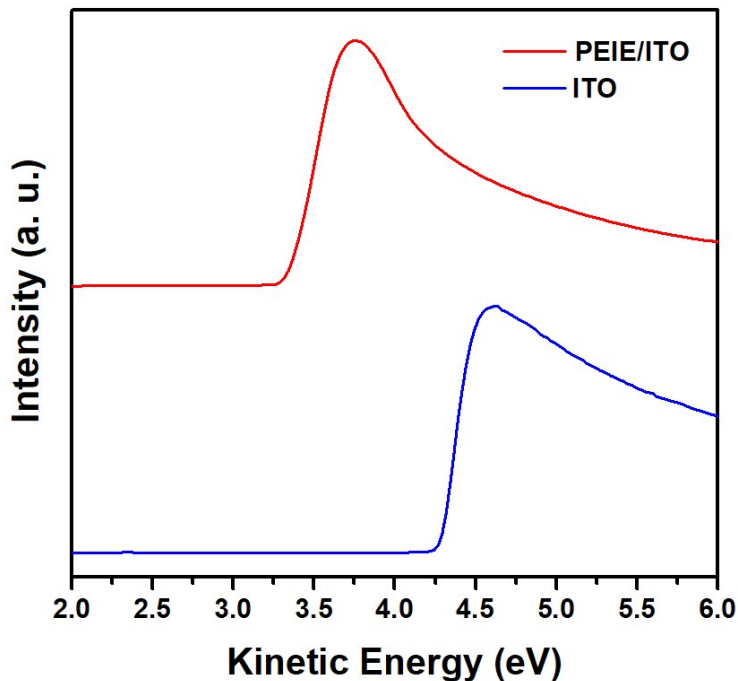

**Figure S4.** The work function of the PEIE/ITO/Glass and ITO/Glass.

The work function value of the ITO, PEIE/ITO structures obtained 4.29 eV, 3.36 eV, respectively. In this structure, the PEIE layer plays a role as a surface modifying layer on the ITO layer for good electron selectivity and efficiently promotes electron transportation to decrease the work function of ITO due to the formation of dipole layer.<sup>1</sup>

6. Energy level diagram of the iPSCs with the MoS<sub>2</sub> interlayer highlighting pathways for charge generation and transport.

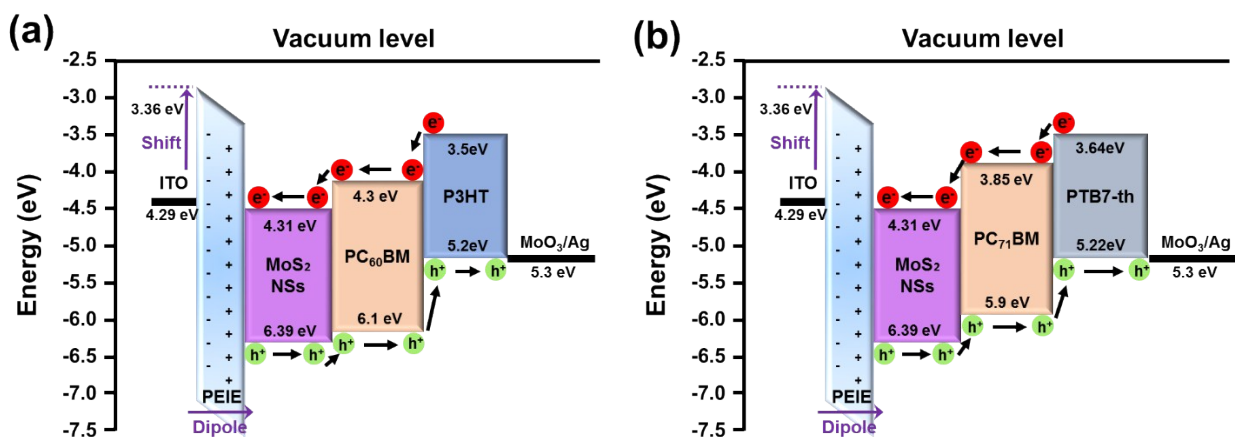

**Figure S5.** Energy level diagrams of the inverted PSCs with the MoS<sub>2</sub> interlayer.

The energy level diagrams of iPSCs demonstrate the possible pathways of current generation and transportation after the excitation of the photoactive materials P3HT:PC<sub>60</sub>BM (a) and PTB7-th:PC<sub>71</sub>BM (b).<sup>2</sup>

## 7. The structure of optical absorption simulation.

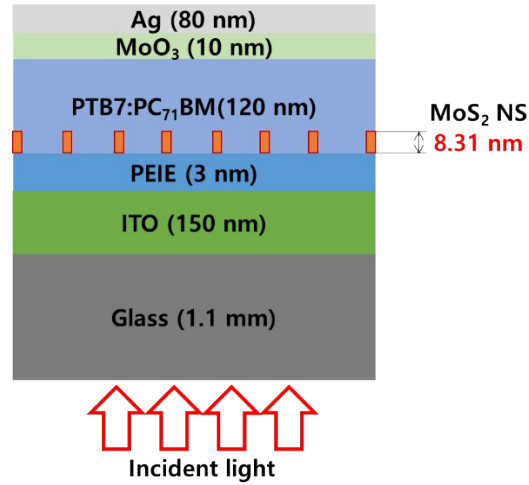

**Figure S6. The structure of optical absorption simulation.**

The solar cell structure used for the simulation is the Ag (80 nm)/MoO<sub>3</sub> (10 nm)/PTB7:PC<sub>71</sub>BM (120 nm)/MoS<sub>2</sub> (8.31 nm)/PEIE (3 nm)/ITO (150 nm)/glass (1.1 mm) structures. MoS<sub>2</sub> NS diameter: 25 nm and spacing between the edges of MoS<sub>2</sub> NS: 104 nm

## Reference

- (1) Hu, Z.; Wu, Z.; Han, Cheng.; He, J.; Ni, Z.; Chen, W. Two-dimensional transition metal dichalcogenides: interface and defect engineering. *Chem. Soc. Rev.* **2018**, *47*, 3100-3128.
- (2) Chen, W.; Qi, D.; Gao, X.; Wee, A. T. S. Surface transfer doping of semiconductors. *Prog. Surf. Sci.* **2009**, *84*, 279-321.
